# Supplementary material
Source: publisher figshare collection journal article supplement (https://geolsoc.figshare.com/ndownloader/files/28662455)

**Supplementary data file B**

**SPSS data**

**Table B Sa.** *Summary of the discriminant function analysis (DFA) results.*

| Sample | Flows | Chem. type | M-distance | Function 1 | Function 2 | SW formation match |
| --- | --- | --- | --- | --- | --- | --- |
| S4 | F37 | C | 48.44 | -1.00 | 0.54 | ? |
| S6 | F36 | 30.42 | 0.26 | -0.42 | ? |
| S9 | F36 (K) | 18.41 | 0.19 | 1.56 | (T) |
| S11 | F35 | 10.77 | 2.36 | 0.12 | Ambenali |
| S13 | F34 | 12.36 | 2.07 | -0.26 | Ambenali |
| S16 | F33 | 18.66 | 0.18 | -0.35 | Poladpur |
| S101 | F32 | 10.53 | 1.87 | 0.61 | Ambenali |
| S104 | F31 (K) | 14.59 | -0.48 | 0.67 | (T) |
| S97 | F30 | 62.73 | 1.97 | 0.23 | ? |
| S96 | F29 (K) | 6.86 | 0.75 | 0.45 | (T) |
| S92 | F28 (K) | 9.17 | 1.73 | -0.45 | (T) |
| S90 | F27 | 61.42 | -1.35 | 0.40 | ? |
| S85 | F26 (K) | 22.78 | 2.62 | -0.28 | ­(T) |
| S83 | F25 | 103.93 | -1.95 | -1.28 | ? |
| S87 | F24 | 4.85 | 0.33 | -0.39 | Poladpur |
| S88 | F 23 (K) | 4.98 | 1.53 | 0.40 | (T) |
| S77 | F 22 (K) | 21.51 | 1.95 | 1.31 | (T) |
| S75 | F21 | 96.05 | 2.88 | -0.65 | ? |
| S74 | F21 | 93.14 | 2.74 | -1.09 | ? |
| S69 | F20 | 18.10 | 0.22 | 1.46 | Khandala |
| S66 | F19 | 5.882 | 0.07 | -0.22 | Poladpur |
| S63 | F18 | 36.92 | 0.48 | -1.01 | ? |
| S60 | F17 | 26.65 | -0.80 | 0.81 | ? |
| S58 | F16 | B | 45.09 | 1.20 | -1.37 | ? |
| S57 | F16 (K) | 23.75 | -1.01 | 1.96 | (T) |
| S55 | F15 | C | 6.32 | 1.76 | 0.30 | Ambenali |
| S53 | F14 | B | 67.97 | -0.01 | -1.55 | ? |
| S52 | F14 | 55.28 | -0.45 | -1.12 | ? |
| S50 | F13 | C | 14.96 | 1.31 | 0.23 | Panhala |
| S49 | F12 | 16.07 | 1.56 | -0.19 | Panhala |
| S48 | F 11 (K) | 18.47 | 0.39 | 1.34 | (T) |
| S45 | F10 | D | 28.73 | -1.93 | 1.07 | ? |
| S41 | F9 | A | 47.12 | -2.61 | -2.25 | ? |
| S36 | F8 | 17.00 | -1.69 | 1.00 | Bushe |
| S34 | F8 | 15.55 | -1.717 | 1.09 | Bushe |
| S33 | F7 | 9.22 | -2.04 | 0.47 | Bushe |
| S30 | F6 | 18.98 | -1.29 | 0.53 | Panhala |
| S29 | F5 | D | 61.62 | -1.75 | 4.11 | ? |
| S28 | F4 | 54.45 | -0.06 | 4.29 | ? |
| S27 | F4 | 54.84 | 0.06 | 3.89 | ? |
| S24 | F3 | C | 10.83 | 2.68 | 0.11 | Bhimashankar |
| S21 | F2 | 3.71 | 1.71 | -0.55 | Bhimashankar |
| S17 | F1 | B | 27.57 | -0.74 | 1.74 | ? |

Abbreviation: Chem. type = Chemical type, K = Koyna and T = Type.

**Table B Sb**. *Summary of the results obtained from the DFA, bivariate, and primitive mantle normalized diagrams for 37 lava flows.*

| Sam-ples | Lava Flows | Chem.  Type | In DFA  Fm. | Bivariates Fm. | | | | Primitive Mantle Norm. Diagram  Fm. | Finale Resulted/ Concluding Fm. |
| --- | --- | --- | --- | --- | --- | --- | --- | --- | --- |
| Ba/Y vs  Nb/Zr | Nb/Zr vs  Ba/Zr | Nb/Zr vs  Sr | Rb/Y vs  Nb/Y |
| S4 | F37 | C | ? | Bu/Po | Kh/Po | Am/Po | Am/Bu/Po | N. C | Unclassified |
| S6 | F36 | ? | Bu/Po/Am | Am/Po | Am/Pa | Am /Pol | N. C | Unclassified |
| S9 | F36(K) | (T) | - | - | - | Bu | N. C | Koyna type |
| S11 | F35 | Am | Am | Am |  | Am | Am | Ambenali |
| S13 | F34 | Am | Am | Am | Am | Am | Am | Ambenali |
| S16 | F33 | Po | Po | Po | Po | Po | Po | Poladpur |
| S101 | F32 | Am | Bu/Po/Pa | Bu/Po/Pa | Bu/Po | Am | Am | Ambenali |
| S104 | F31(K) | (T) | Bu/Pa | Kh/Bu/Pa | Kh/Bu/Pa | Kh/Bu/Po | N. C | Koyna type |
| S97 | F30 | ? | Bh/Bu/Po | Bu/Po | Kh/Bu/Po | Bu/Po/Am | N. C | Unclassified |
| S96 | F29(K) | (T) | Bu/Po/Pa | Kh/Bu/Po | Am/Po/Pa | Kh/Bu | N. C | Koyna type |
| S92 | F28(K) | (T) | Bu/Po/Am | Bu/Po | Bu/Po/Am | Bu/Po/Am | N. C | Koyna type |
| S90 | F27 | ? | Bu/Po/Pa | Bu/Po/Am | Kh/Po/Am | Bu/Po/Am | N. C | Unclassified |
| S85 | F26(K) | ­(T) | Bu/Po | Kh/Bu/Po | - | - | N. C | Koyna type |
| S83 | F25 | ? | Am | Am | Po/Am | - | N. C | Unclassified |
| S87 | F24 | Po | Po | Po | Po | Po | Po | Poladpur |
| S88 | F23(K) | (T) | Pa | Kh/Bu/Po | Am/Po/Pa | Kh/Bu/Po/Pa | N. C | Koyna type |
| S77 | F22(K) | (T) | Bu/Po | Bu/Po/Am | Bu/Po/Am | Kh/Po/Am | N. C | Koyna type |
| S75 | F21 | ? | Am | Am | Po/Am | Po | N. C | Unclassified |
| S74 | F21 | ? | Am | Am | Po/Am | Po | N. C | Unclassified |
| S69 | F20 | Kh | Kh | Kh | Kh | Kh | Kh | Khandala |
| S66 | F19 | Po | Po/Am | Po | Po | Po | Po | Poladpur |
| S63 | F18 | ? | Po/Am | Po/Am | Po/Am | Po/Am | N. C | Unclassified |
| S60 | F17 | ? | Po/Am | Bu/Po/Pa | Bu/Po | Bu/Po/Pa | N. C | Unclassified |
| S58 | F16 | B | ? | Am | Am | Po/Am | - | N. C | Unclassified |
| S57 | F16(K) | (T) | Bu/Pa | Bu/Po/Pa | Kh/Bu/Po | Kh/Bu/Po | N. C | Koyna type |
| S55 | F15 | C | Am | Bu/Po | Bu/Pa/Am | Kh/Bu/Po | Am | Am | Ambenali |
| S53 | F14 | B | ? | Bu/Po | Kh/Bu/Po | Po/Am/Pa | Kh/Bu | N. C | Unclassified |
| S52 | F14 | ? | Bu/Po | Kh/Bu/Po | Kh/Am | Kh/Bu | N. C | Unclassified |
| S50 | F13 | C | Pa | Bu | Kh/Bu/Po | Bu/Po | Bu/Po/Pa | Pa | Poladpur |
| S49 | F12 | Pa | Bu/Po | Kh/Bu/Po | Bu/Po | Bu/Po/Pa | Pa | Panhala |
| S48 | F11(K) | (T) | Kh/Bu | Kh/Bu/Po | Bu/Po/Am | Kh/Bu/Po | N. C | Koyna type |
| S45 | F10 | D | ? | Kh/Bu/Po | Bu/Po | Am/Po | Kh/Bu | N. C | Unclassified |
| S41 | F9 | A | ? | - | - | Am/Po | - | N. C | Unclassified |
| S36 | F8 | Bu | Bu | Bu | Bu | Bu | Bu | Bushe |
| S34 | F8 | Bu | Bu | Bu | Bu | Bu | Bu | Bushe |
| S33 | F7 | Bu | Bu | Bu | Bu | Bu | Bu | Bushe |
| S30 | F6 | Pan | Bu | Kh/Bu | Bu | Kh/Bu | Bu | Bushe |
| S29 | F5 | D | ? | Kh/Bu | Bu/Po | Bu/Po | Kh/Bu/Po | N. C | Unclassified |
| S28 | F4 | ? | Bu/Po | Bu/Po | Bu/Po | Kh/Po | N. C | Unclassified |
| S27 | F4 | ? | Bu/Po | Bu/Po | Bu/Po | Kh/Po | N. C | Unclassified |
| S24 | F3 | C | Bh | Bh | Bh | Bh | Bh | N. C | Bhimashankar |
| S21 | F2 | Bh | Bh | Bh | Bh | Bh | N. C | Bhimashankar |
| S17 | F1 | B | ? | Kh/Bu/Po | Kh/Bu/Po | Po/Am/Pa | Bh/Kh/Bu/Po | N. C | Unclassified |

Abbreviations: Am = Ambenali, Bh = Bhimashankar, Bu = Bushe, DFA = Discriminant Function Analysis, Fm. = Formation, K = Koyna, Kh = Khandala, N.C. = Not classified, Pa = Panhala, Po = Poladpur and T = Type.

**Figure B Sa** *DFA diagram*


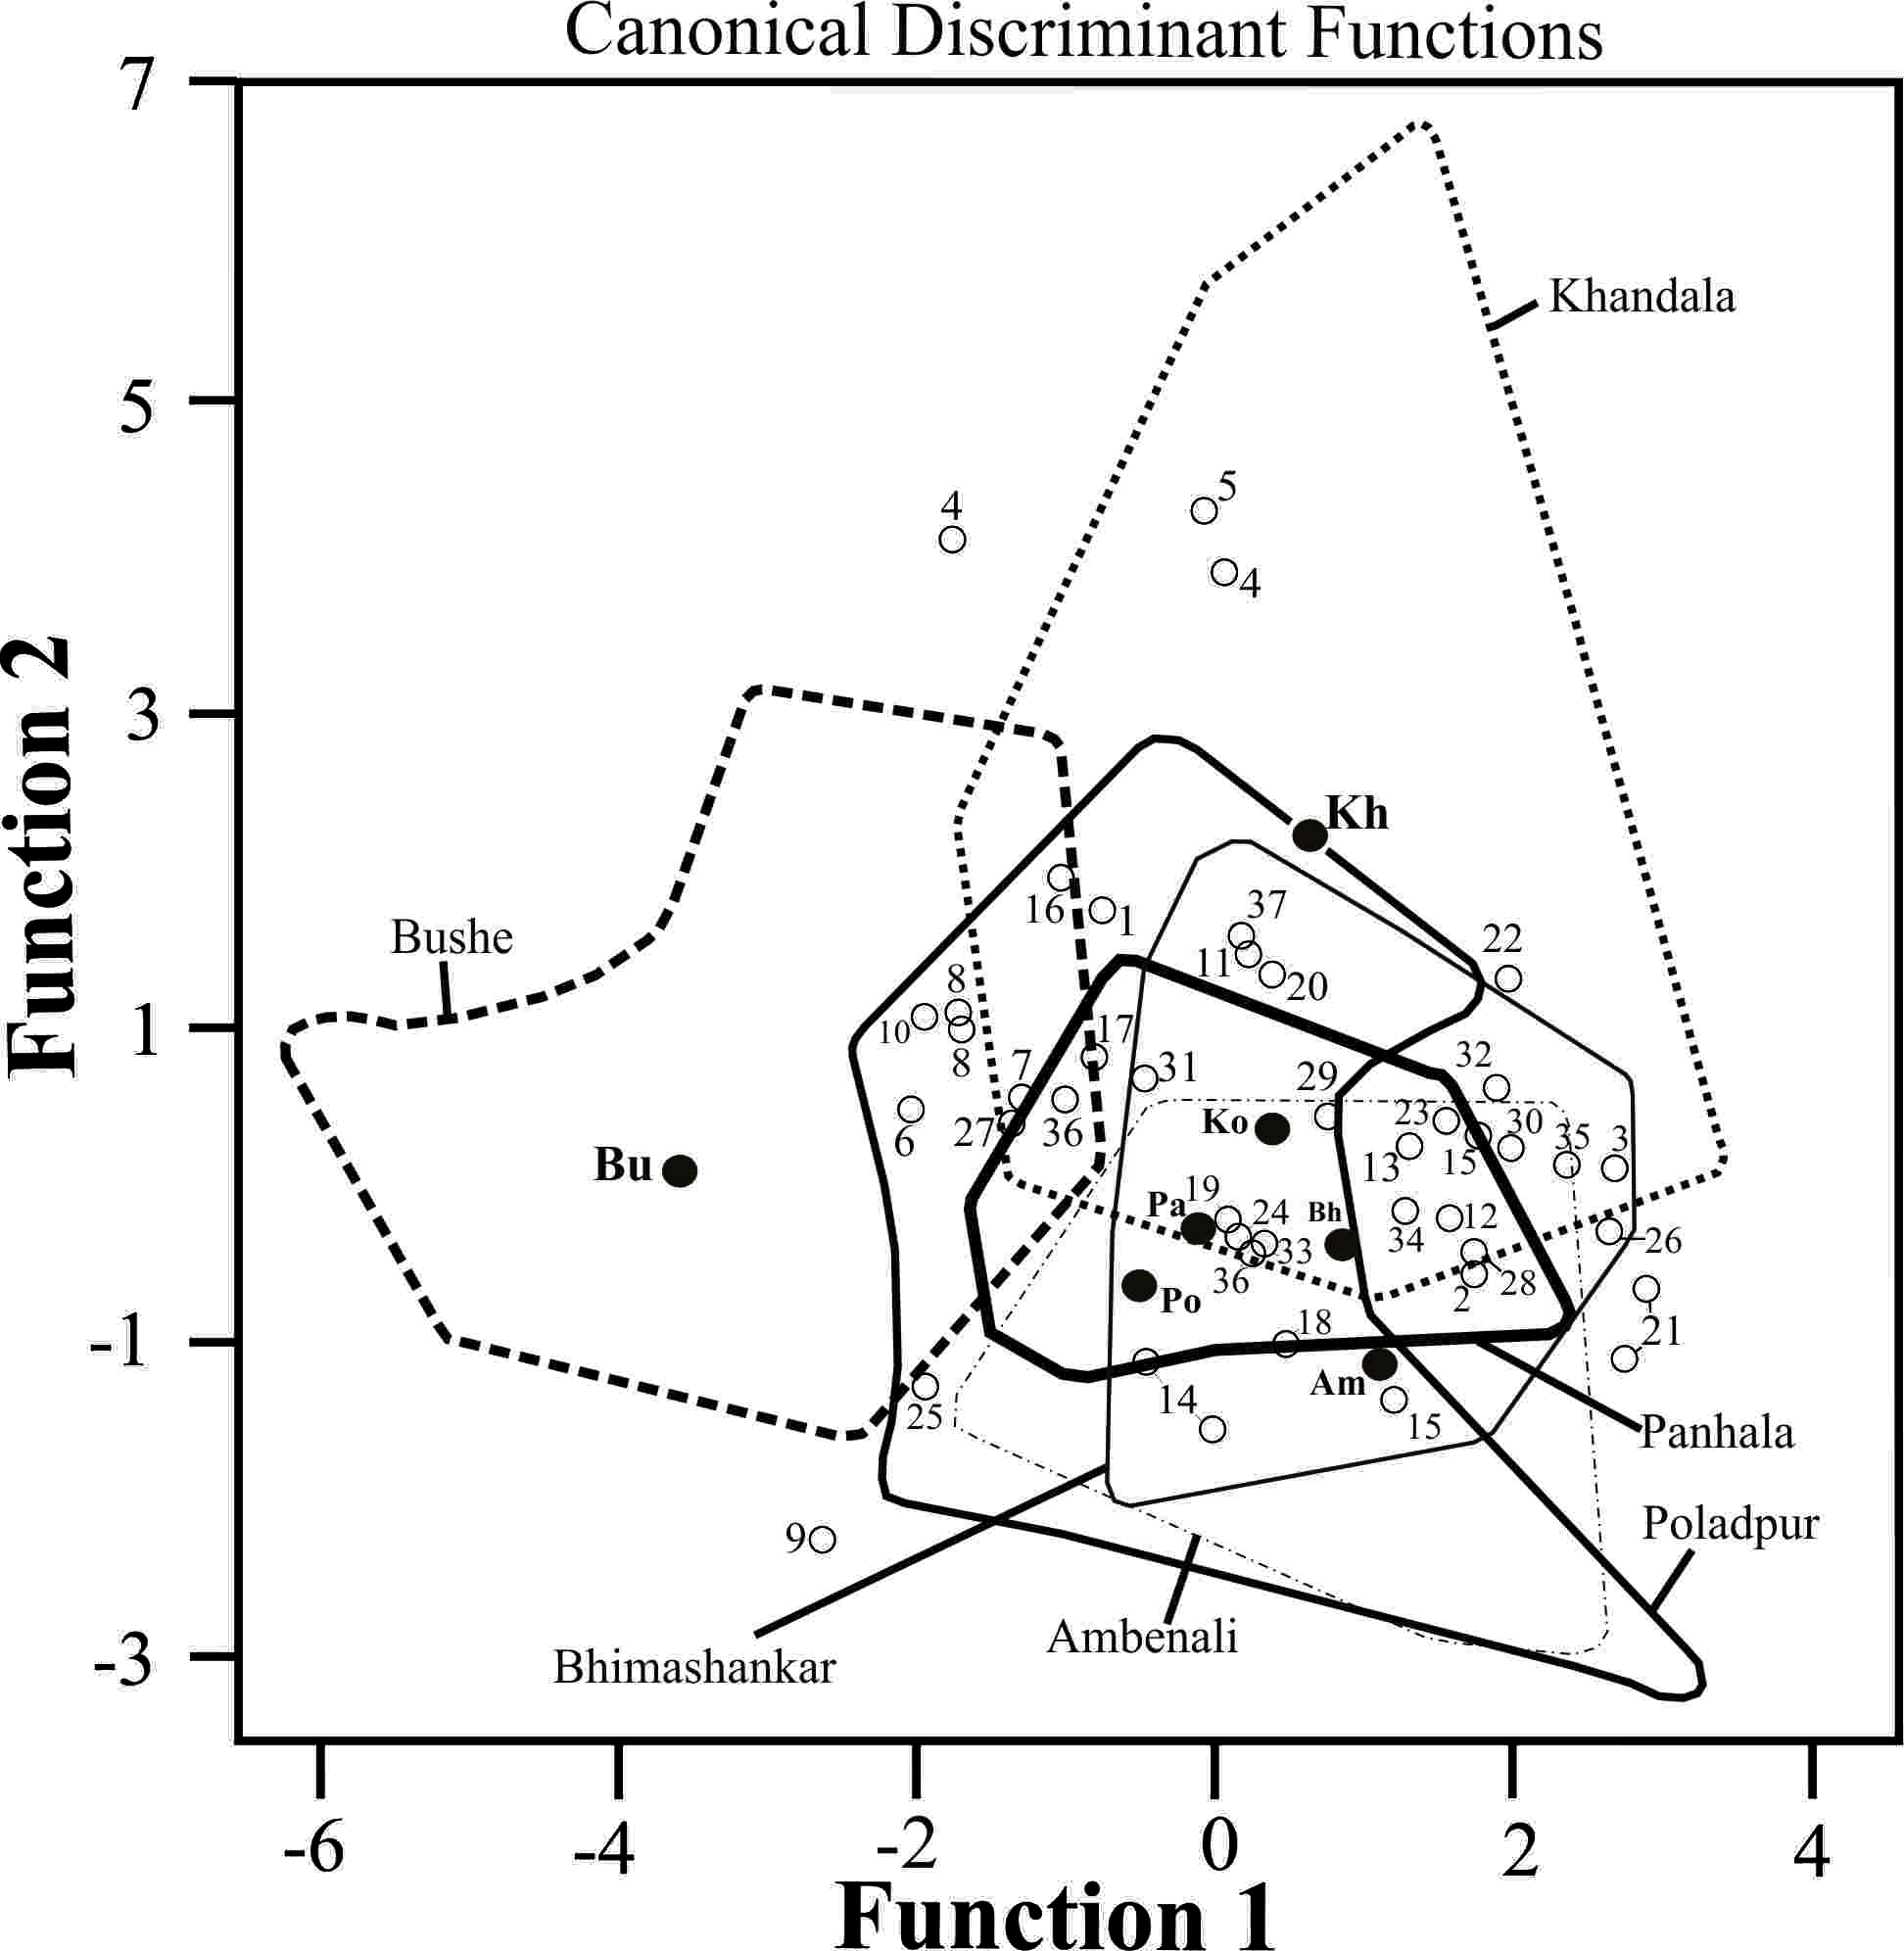


**Figure B Sb**Bivariate plots according to DFA results:


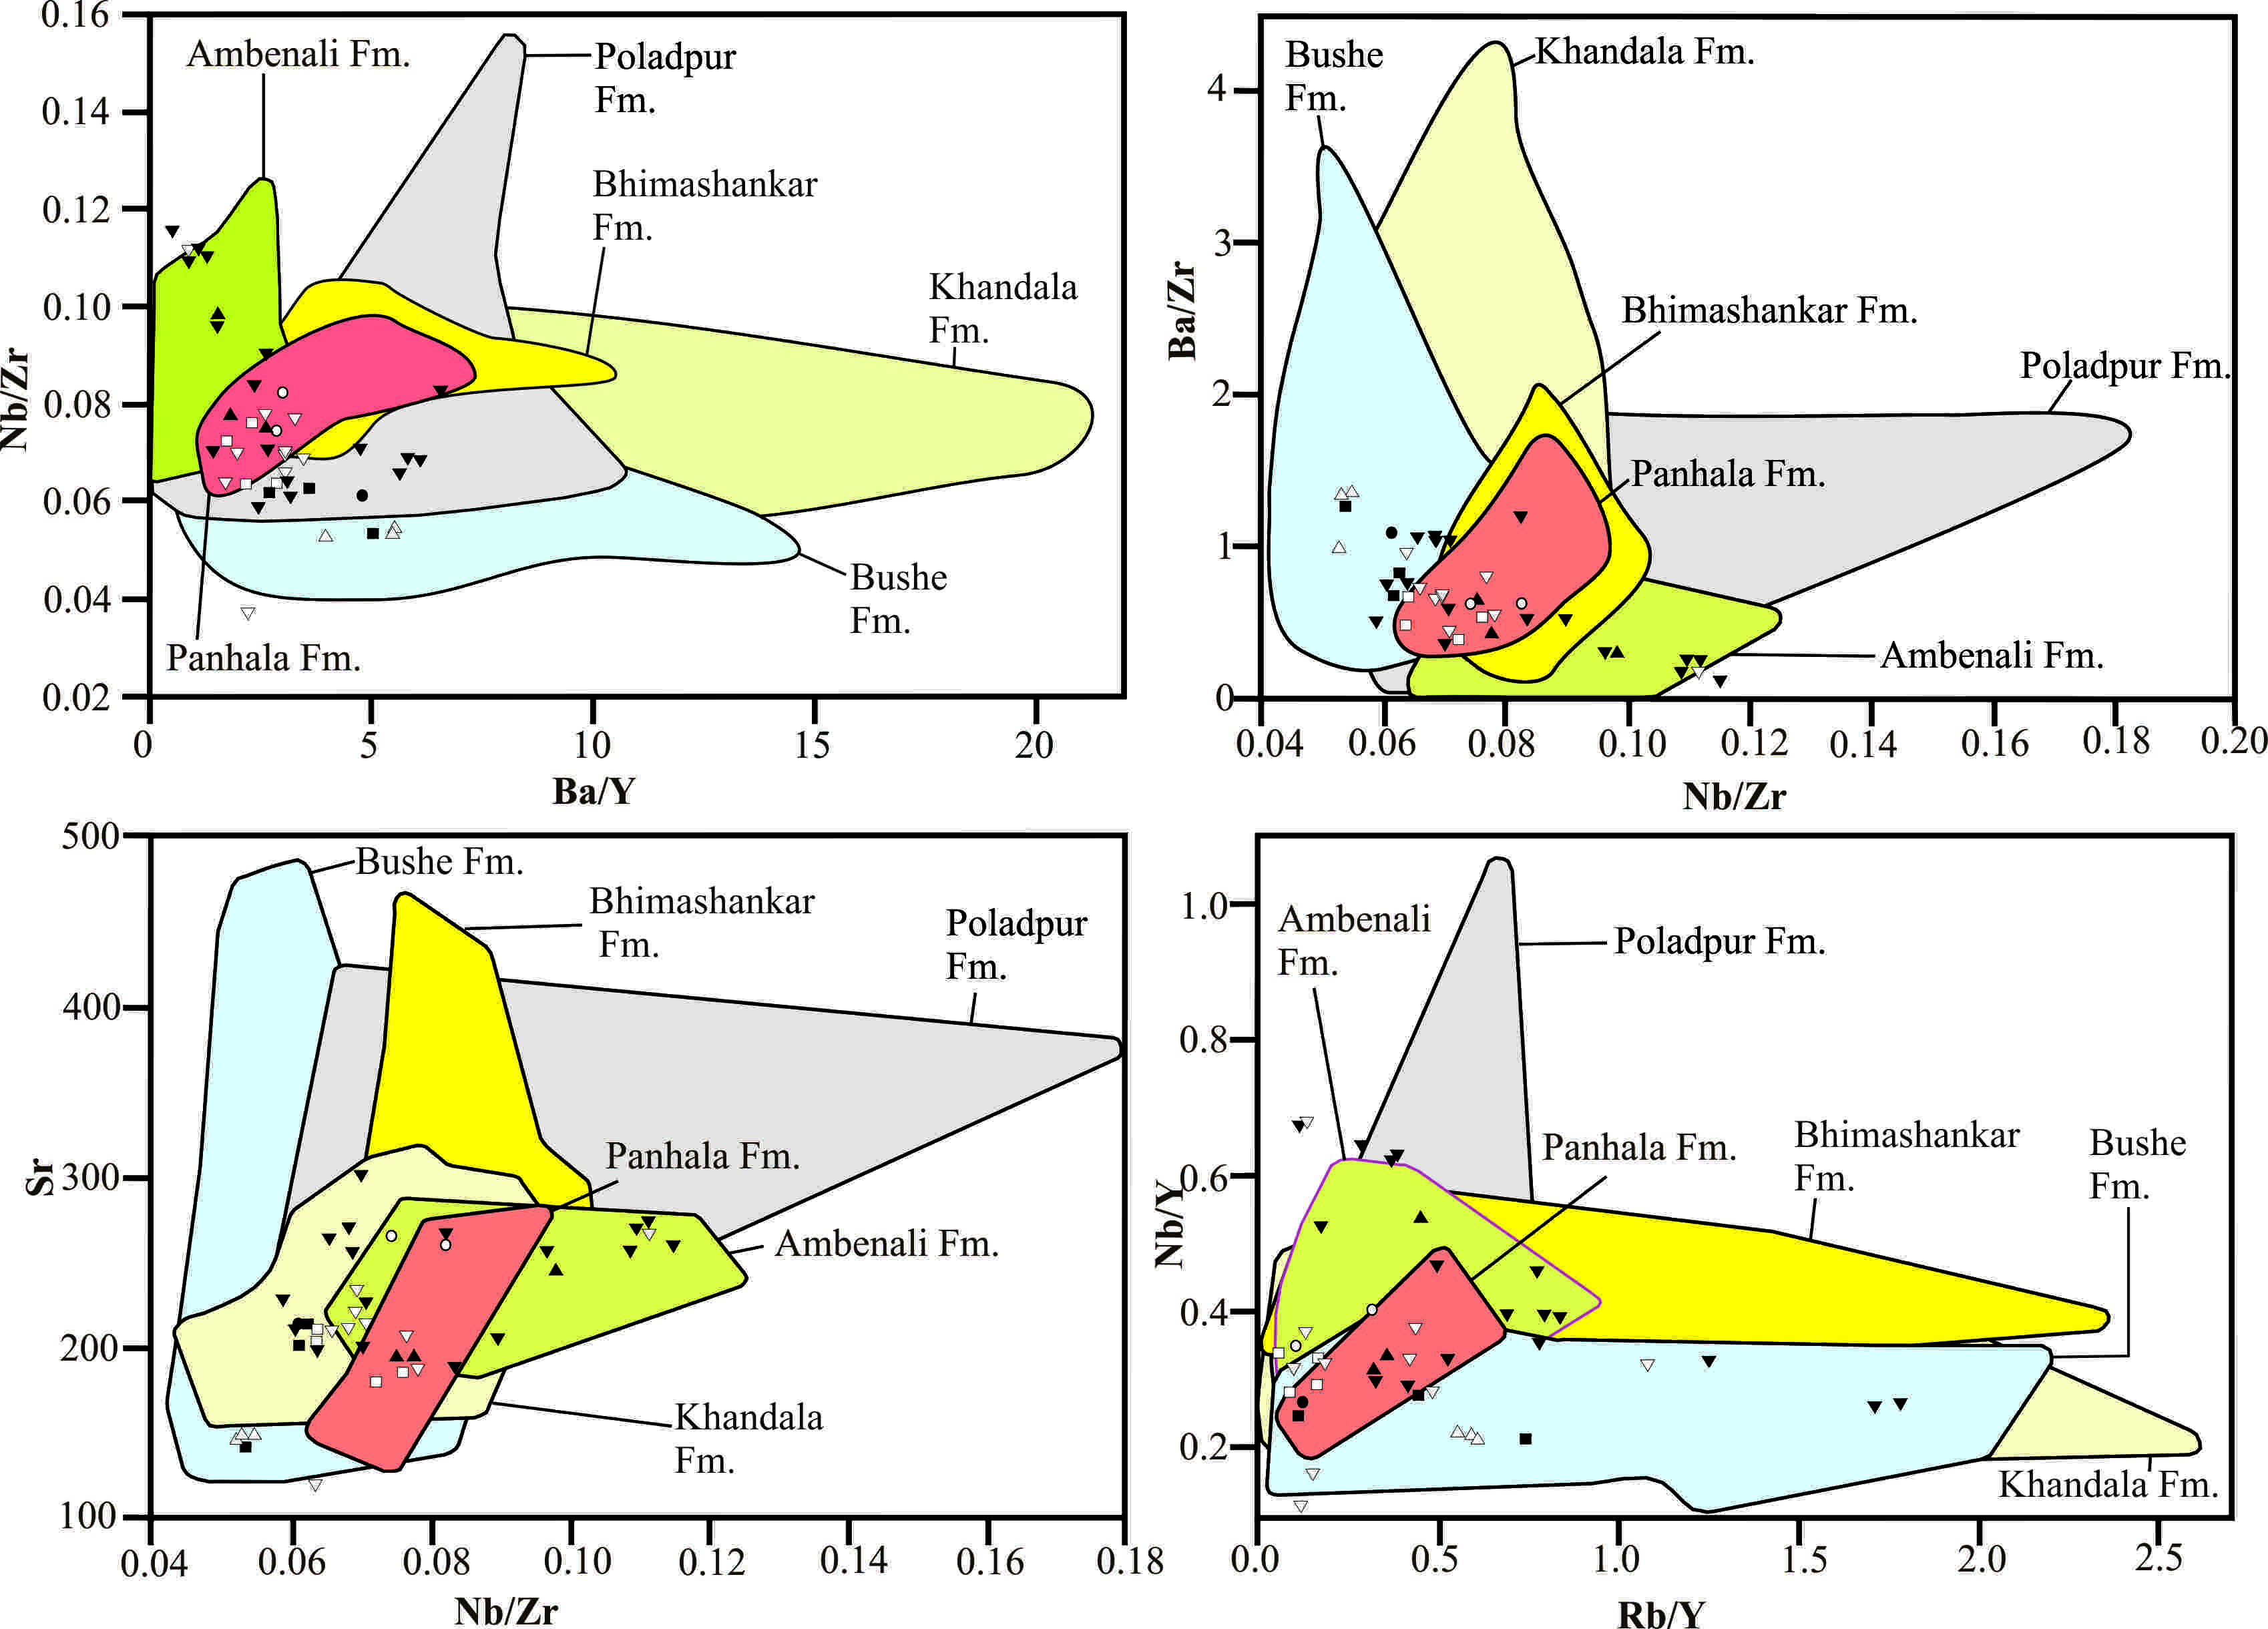


**Figure B Sc**Mantle-Normalized diagram according to DFA results:


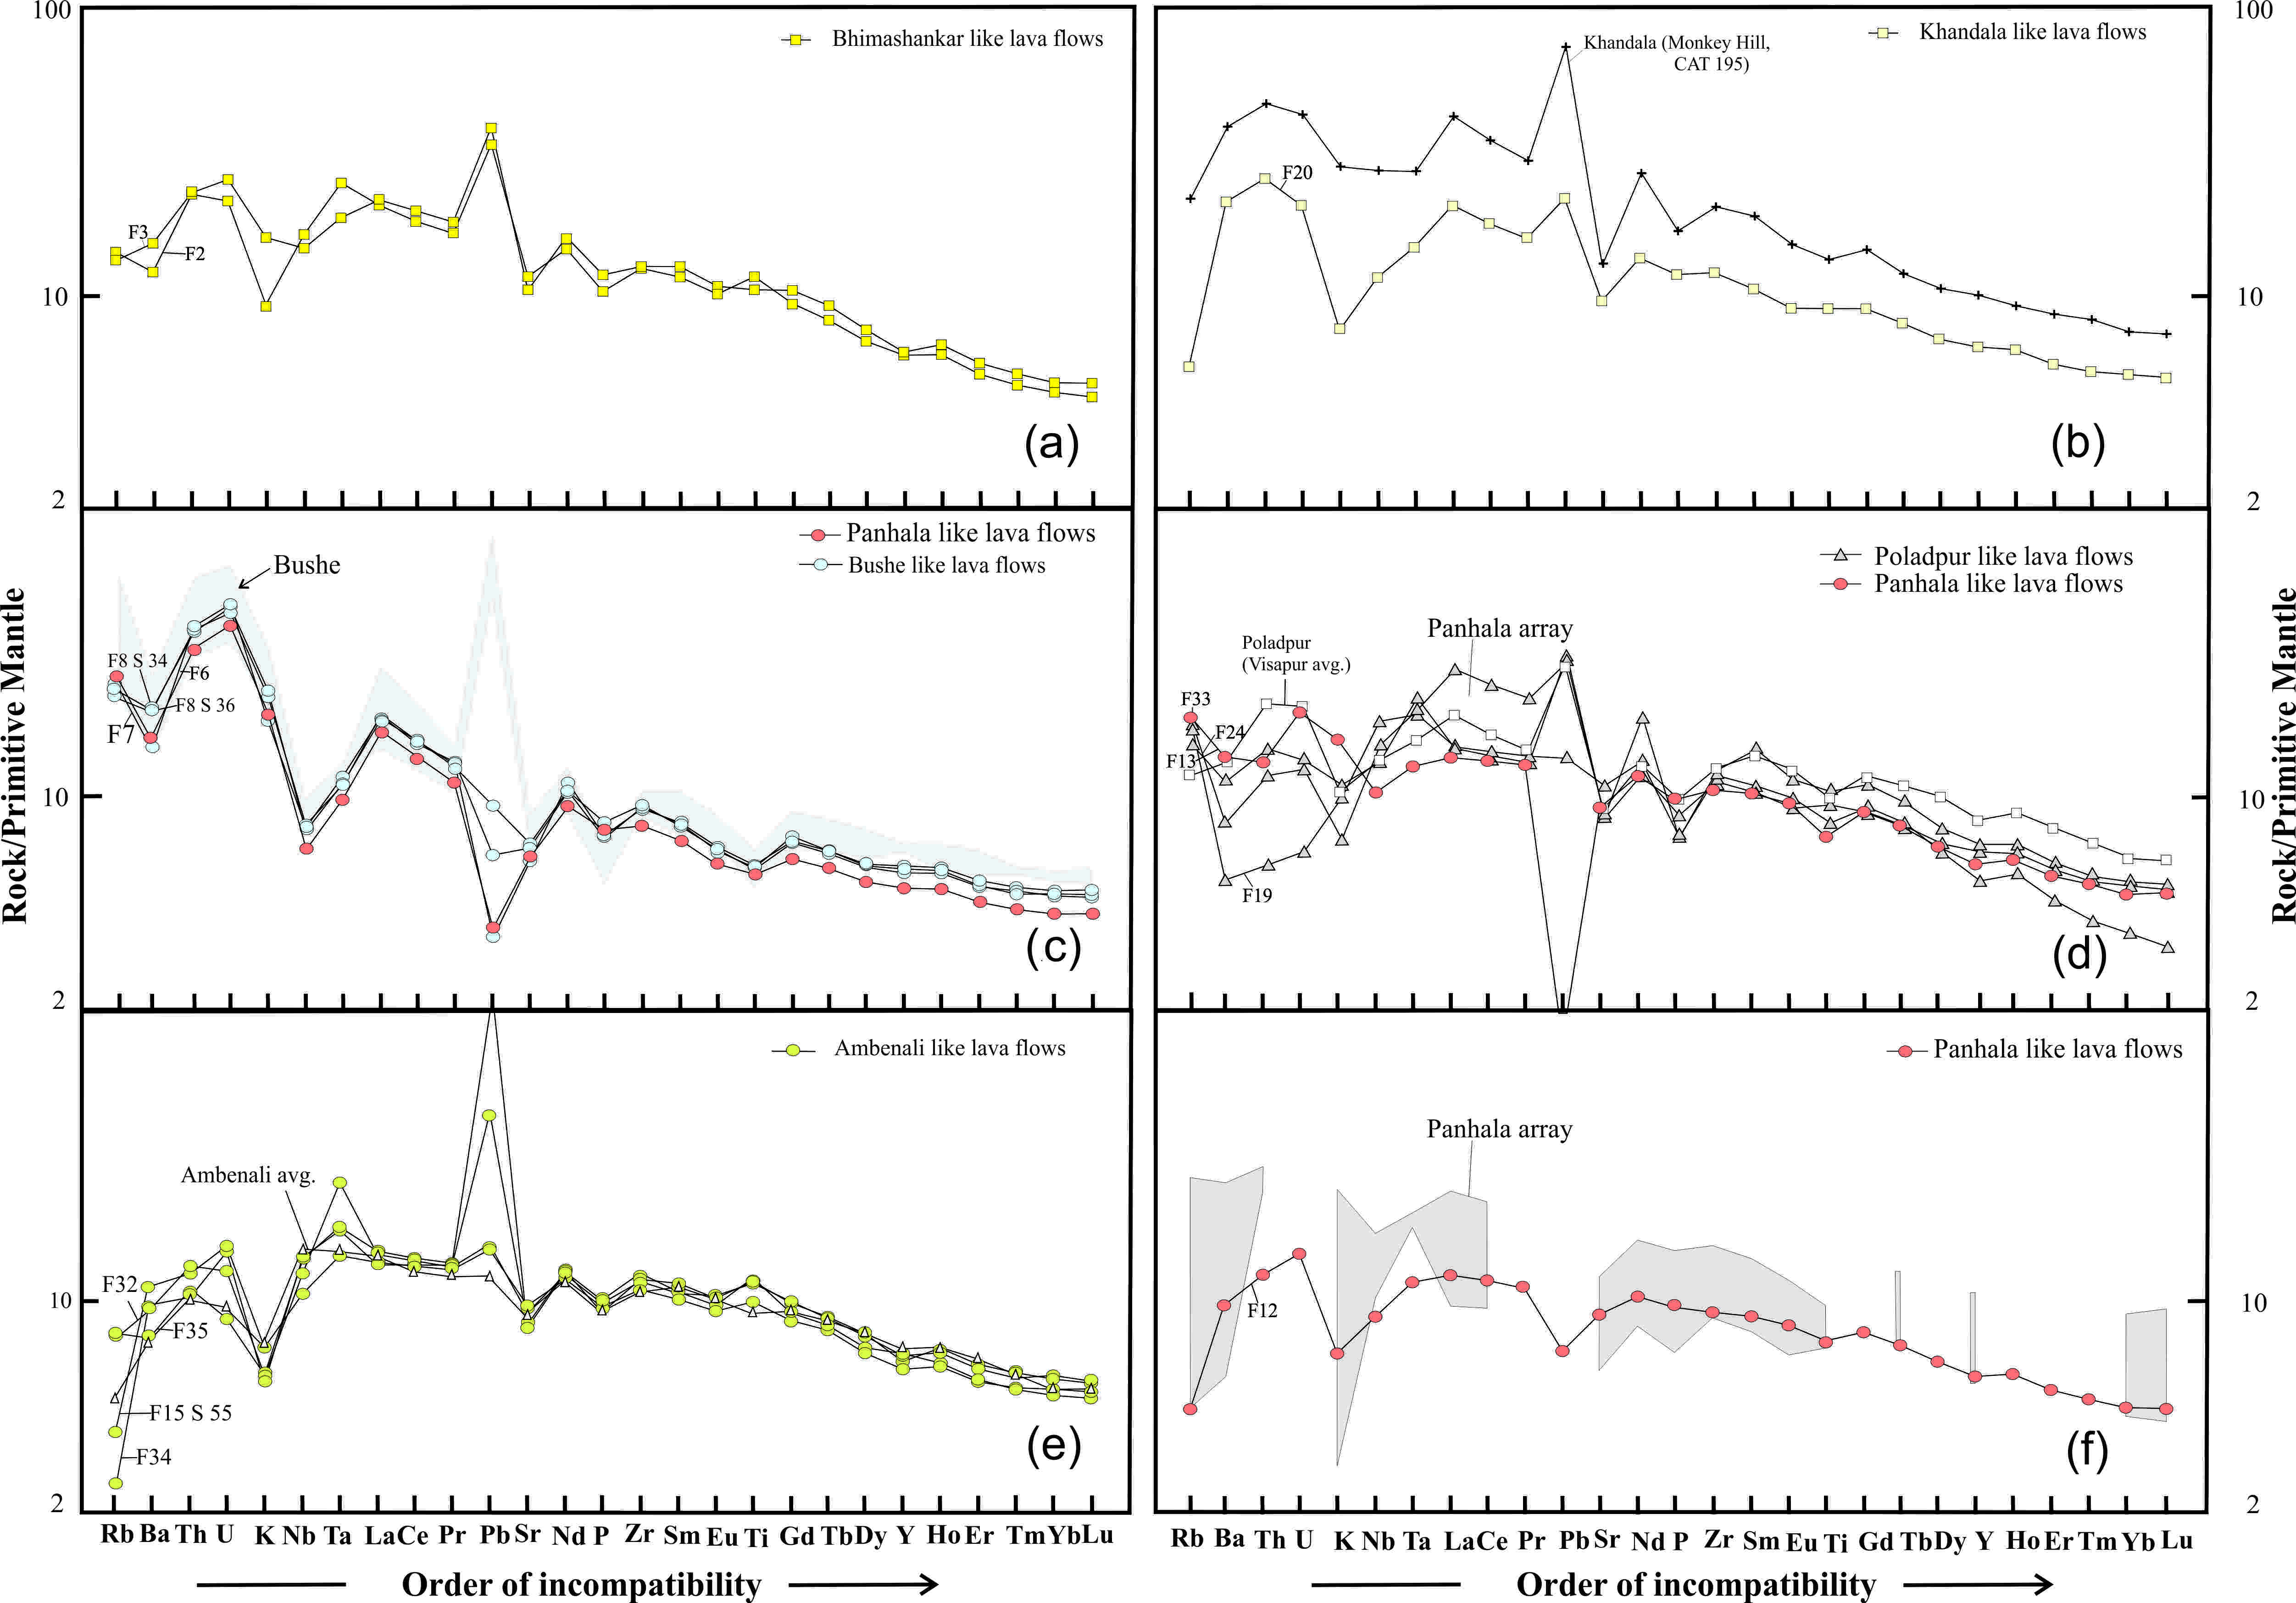

Supplement: Supplementary file 1 [file 28662455]
